# Supplementary material
Source: publisher figshare collection journal article supplement (https://gsajournals.figshare.com/ndownloader/files/30688406)
Supplement: Supplementary file 1 [file 30688406]

## Sheet: Upregulated - 4 HPI
Dataset S07. Gene ontology terms overrepresented in Arabidopsis differentially expressed gene (DEG) datasets. Two DEG datasets were created from plants inoculated with 5 x 106 CFU/mL of either Escherichia coli O157:H7 or Salmonella enterica Typhimurium 14028s at 4 and 24 hours post inoculation (HPI). Ovelapping (shared column) and unique (bacterium-specific). DEGs in the two datasets were used as…
Shared							O157:H7 Specific							STm 14028s Specific
ALL GO TERMS							ALL GO TERMS							ALL GO TERMS
Analysis Type:	PANTHER Overrepresentation Test (Released 20190711)						Analysis Type:	PANTHER Overrepresentation Test (Released 20190711)						No significant GO term
Annotation Version and Release Date:	GO Ontology database Released 2019-12-09						Annotation Version and Release Date:	GO Ontology database Released 2019-12-09
Analyzed List:	upload_1 (Arabidopsis thaliana)						Analyzed List:	upload_1 (Arabidopsis thaliana)
Reference List:	Arabidopsis thaliana (all genes in database)						Reference List:	Arabidopsis thaliana (all genes in database)
Test Type:	FISHER						Test Type:	FISHER
Correction:	BONFERRONI						Correction:	BONFERRONI
Bonferroni count:	2757						Bonferroni count:	2757
GO biological process complete	Arabidopsis thaliana - REFLIST (27581)	upload_1 (102)	upload_1 (expected)	upload_1 (over/under)	upload_1 (fold Enrichment)	upload_1 (P-value)	GO biological process complete	Arabidopsis thaliana - REFLIST (27581)	upload_1 (773)	upload_1 (expected)	upload_1 (over/under)	upload_1 (fold Enrichment)	upload_1 (P-value)
defense response (GO:0006952)	1009	17	3.73	+	4.56	0.000562	maturation of LSU-rRNA (GO:0000470)	46	13	1.29	+	10.08	1.46e-05
defense response to other organism (GO:0098542)	765	14	2.83	+	4.95	0.00289	Golgi organization (GO:0007030)	35	9	0.98	+	9.17	0.0066
multi-organism process (GO:0051704)	1497	18	5.54	+	3.25	0.0272	ribosomal large subunit biogenesis (GO:0042273)	107	23	3	+	7.67	2.72e-09
response to antibiotic (GO:0046677)	286	8	1.06	+	7.56	0.0375	endoplasmic reticulum to Golgi vesicle-mediated transport (GO:0006888)	102	14	2.86	+	4.9	0.00954
response to bacterium (GO:0009617)	478	10	1.77	+	5.66	0.0365	ribonucleoprotein complex assembly (GO:0022618)	154	19	4.32	+	4.4	0.000808
response to biotic stimulus (GO:0009607)	1024	16	3.79	+	4.23	0.00354	ribonucleoprotein complex subunit organization (GO:0071826)	157	19	4.4	+	4.32	0.00106
response to drug (GO:0042493)	501	11	1.85	+	5.94	0.0084	Golgi vesicle transport (GO:0048193)	172	20	4.82	+	4.15	0.000939
response to external biotic stimulus (GO:0043207)	1023	16	3.78	+	4.23	0.0035	ribonucleoprotein complex biogenesis (GO:0022613)	422	47	11.83	+	3.97	5.28e-11
response to external stimulus (GO:0009605)	1426	18	5.27	+	3.41	0.0141	ribosome biogenesis (GO:0042254)	351	39	9.84	+	3.96	9.79e-09
response to other organism (GO:0051707)	1023	16	3.78	+	4.23	0.0035	rRNA processing (GO:0006364)	236	26	6.61	+	3.93	4.62e-05
response to oxidative stress (GO:0006979)	393	11	1.45	+	7.57	0.000835	rRNA metabolic process (GO:0016072)	242	26	6.78	+	3.83	7.35e-05
response to stress (GO:0006950)	3088	28	11.42	+	2.45	0.0146	translation (GO:0006412)	431	42	12.08	+	3.48	6.87e-08
Unclassified (UNCLASSIFIED)	6709	25	24.81	+	1.01	0	peptide biosynthetic process (GO:0043043)	436	42	12.22	+	3.44	9.59e-08
CHILD GO TERMS REPRESENTING HIERARCHICAL CATEGORIES							peptide metabolic process (GO:0006518)	517	47	14.49	+	3.24	4.06e-08
GO biological process complete	Arabidopsis thaliana - REFLIST (27581)	upload_1 (102)	upload_1 (expected)	upload_1 (over/under)	upload_1 (fold Enrichment)	upload_1 (P-value)	vesicle-mediated transport (GO:0016192)	431	38	12.08	+	3.15	8.12e-06
defense response to other organism (GO:0098542)	765	14	2.83	+	4.95	0.00289	ncRNA processing (GO:0034470)	344	30	9.64	+	3.11	0.000466
response to antibiotic (GO:0046677)	286	8	1.06	+	7.56	0.0375	amide biosynthetic process (GO:0043604)	502	43	14.07	+	3.06	1.67e-06
response to bacterium (GO:0009617)	478	10	1.77	+	5.66	0.0365	ncRNA metabolic process (GO:0034660)	407	34	11.41	+	2.98	0.000185
response to drug (GO:0042493)	501	11	1.85	+	5.94	0.0084	cellular amide metabolic process (GO:0043603)	643	53	18.02	+	2.94	6.07e-08
response to oxidative stress (GO:0006979)	393	11	1.45	+	7.57	0.000835	intracellular transport (GO:0046907)	690	56	19.34	+	2.9	2.83e-08
							intracellular protein transport (GO:0006886)	563	44	15.78	+	2.79	1.42e-05
							protein transport (GO:0015031)	697	53	19.53	+	2.71	9.26e-07
							establishment of protein localization (GO:0045184)	706	53	19.79	+	2.68	1.41e-06
							cellular protein-containing complex assembly (GO:0034622)	429	32	12.02	+	2.66	0.00449
							peptide transport (GO:0015833)	717	53	20.1	+	2.64	3.52e-06
							amide transport (GO:0042886)	733	53	20.54	+	2.58	5.56e-06
							protein-containing complex assembly (GO:0065003)	479	34	13.42	+	2.53	0.00766
							cellular protein localization (GO:0034613)	651	46	18.25	+	2.52	0.00012
							macromolecule biosynthetic process (GO:0009059)	1065	75	29.85	+	2.51	6.55e-09
							cellular macromolecule localization (GO:0070727)	686	48	19.23	+	2.5	7.75e-05
							gene expression (GO:0010467)	1410	98	39.52	+	2.48	4.04e-12
							protein localization (GO:0008104)	794	55	22.25	+	2.47	1.29e-05
							cellular component biogenesis (GO:0044085)	1170	81	32.79	+	2.47	2.39e-09
							protein-containing complex subunit organization (GO:0043933)	554	38	15.53	+	2.45	0.00349
							RNA processing (GO:0006396)	762	52	21.36	+	2.43	5e-05
							cellular macromolecule biosynthetic process (GO:0034645)	1021	69	28.62	+	2.41	3.12e-07
							cellular localization (GO:0051641)	892	60	25	+	2.4	7.88e-06
							cellular nitrogen compound biosynthetic process (GO:0044271)	1027	69	28.78	+	2.4	3.68e-07
							organonitrogen compound biosynthetic process (GO:1901566)	1163	74	32.59	+	2.27	7.87e-07
							nitrogen compound transport (GO:0071705)	935	57	26.2	+	2.18	0.000392
							macromolecule localization (GO:0033036)	988	59	27.69	+	2.13	0.000484
							organic substance transport (GO:0071702)	1132	64	31.73	+	2.02	0.00109
							cellular nitrogen compound metabolic process (GO:0034641)	2687	133	75.31	+	1.77	9.29e-07
							organic substance biosynthetic process (GO:1901576)	2308	114	64.69	+	1.76	2.71e-05
							cellular biosynthetic process (GO:0044249)	2274	110	63.73	+	1.73	0.000148
							biosynthetic process (GO:0009058)	2454	115	68.78	+	1.67	0.0003
							cellular component organization or biogenesis (GO:0071840)	2830	132	79.32	+	1.66	3.28e-05
							macromolecule metabolic process (GO:0043170)	4716	185	132.17	+	1.4	0.00579
							nitrogen compound metabolic process (GO:0006807)	5448	209	152.69	+	1.37	0.00422
							primary metabolic process (GO:0044238)	6141	224	172.11	+	1.3	0.0489
							Unclassified (UNCLASSIFIED)	6709	142	188.03	-	0.76	0
							CHILD GO TERMS REPRESENTING HIERARCHICAL CATEGORIES
							GO biological process complete	Arabidopsis thaliana - REFLIST (27581)	upload_1 (773)	upload_1 (expected)	upload_1 (over/under)	upload_1 (fold Enrichment)	upload_1 (P-value)
							maturation of LSU-rRNA (GO:0000470)	46	13	1.29	+	10.08	1.46e-05
							Golgi organization (GO:0007030)	35	9	0.98	+	9.17	0.0066
							endoplasmic reticulum to Golgi vesicle-mediated transport (GO:0006888)	102	14	2.86	+	4.9	0.00954
							ribonucleoprotein complex assembly (GO:0022618)	154	19	4.32	+	4.4	0.000808
							translation (GO:0006412)	431	42	12.08	+	3.48	6.87e-08
							intracellular protein transport (GO:0006886)	563	44	15.78	+	2.79	1.42e-05

## Sheet: Upregulated - 24 HPI
Dataset S07. Gene ontology terms overrepresented in Arabidopsis differentially expressed gene (DEG) datasets. Two DEG datasets were created from plants inoculated with 5 x 106 CFU/mL of either Escherichia coli O157:H7 or Salmonella enterica Typhimurium 14028s at 4 and 24 hours post inoculation (HPI). Ovelapping (shared column) and unique (bacterium-specific). DEGs in the two datasets were used as…
Shared							O157:H7 Specific							STm 14028s Specific
ALL GO TERMS							ALL GO TERMS							ALL GO TERMS
Analysis Type:	PANTHER Overrepresentation Test (Released 20190711)						Analysis Type:	PANTHER Overrepresentation Test (Released 20190711)						Analysis Type:	PANTHER Overrepresentation Test (Released 20190711)
Annotation Version and Release Date:	GO Ontology database Released 2019-12-09						Annotation Version and Release Date:	GO Ontology database Released 2019-12-09						Annotation Version and Release Date:	GO Ontology database Released 2019-12-09
Analyzed List:	upload_1 (Arabidopsis thaliana)						Analyzed List:	upload_1 (Arabidopsis thaliana)						Analyzed List:	upload_1 (Arabidopsis thaliana)
Reference List:	Arabidopsis thaliana (all genes in database)						Reference List:	Arabidopsis thaliana (all genes in database)						Reference List:	Arabidopsis thaliana (all genes in database)
Test Type:	FISHER						Test Type:	FISHER						Test Type:	FISHER
Correction:	BONFERRONI						Correction:	BONFERRONI						Correction:	BONFERRONI
Bonferroni count:	2757						Bonferroni count:	2757						Bonferroni count:	2757
GO biological process complete	Arabidopsis thaliana - REFLIST (27581)	upload_1 (245)	upload_1 (expected)	upload_1 (over/under)	upload_1 (fold Enrichment)	upload_1 (P-value)	GO biological process complete	Arabidopsis thaliana - REFLIST (27581)	upload_1 (272)	upload_1 (expected)	upload_1 (over/under)	upload_1 (fold Enrichment)	upload_1 (P-value)	GO biological process complete	Arabidopsis thaliana - REFLIST (27581)	upload_1 (1225)	upload_1 (expected)	upload_1 (over/under)	upload_1 (fold Enrichment)	upload_1 (P-value)
activation of immune response (GO:0002253)	63	7	0.56	+	12.51	0.00776	response to acid chemical (GO:0001101)	1127	29	11.11	+	2.61	0.00995	aerobic respiration (GO:0009060)	81	15	3.6	+	4.17	0.0351
activation of innate immune response (GO:0002218)	62	7	0.55	+	12.71	0.00704	response to abiotic stimulus (GO:0009628)	2067	47	20.38	+	2.31	0.000283	biological regulation (GO:0065007)	5664	354	251.56	+	1.41	3.35e-08
benzene-containing compound metabolic process (GO:0042537)	51	6	0.45	+	13.24	0.0301	Unclassified (UNCLASSIFIED)	6709	47	66.16	-	0.71	0	biological_process (GO:0008150)	20872	1014	927.02	+	1.09	1.28e-05
cell communication (GO:0007154)	1565	42	13.9	+	3.02	6.23e-07	CHILD GO TERMS REPRESENTING HIERARCHICAL CATEGORIES							carbohydrate derivative metabolic process (GO:1901135)	626	54	27.8	+	1.94	0.0328
cellular process (GO:0009987)	10105	136	89.76	+	1.52	8.47e-06	GO biological process complete	Arabidopsis thaliana - REFLIST (27581)	upload_1 (272)	upload_1 (expected)	upload_1 (over/under)	upload_1 (fold Enrichment)	upload_1 (P-value)	cell communication (GO:0007154)	1565	152	69.51	+	2.19	1.79e-14
cellular response to chemical stimulus (GO:0070887)	1129	42	10.03	+	4.19	2.22e-11	response to acid chemical (GO:0001101)	1127	29	11.11	+	2.61	0.00995	cell death (GO:0008219)	112	21	4.97	+	4.22	0.000581
cellular response to decreased oxygen levels (GO:0036294)	236	21	2.1	+	10.02	4.39e-11	response to abiotic stimulus (GO:0009628)	2067	47	20.38	+	2.31	0.000283	cellular macromolecule metabolic process (GO:0044260)	3605	221	160.11	+	1.38	0.00379
cellular response to hypoxia (GO:0071456)	234	21	2.08	+	10.1	3.76e-11								cellular metabolic process (GO:0044237)	6840	398	303.8	+	1.31	9.65e-06
cellular response to organic substance (GO:0071310)	756	23	6.72	+	3.42	0.00132								cellular process (GO:0009987)	10105	636	448.81	+	1.42	6.92e-23
cellular response to oxygen levels (GO:0071453)	236	21	2.1	+	10.02	4.39e-11								cellular protein metabolic process (GO:0044267)	2707	197	120.23	+	1.64	8.48e-08
cellular response to stimulus (GO:0051716)	2427	72	21.56	+	3.34	1.17e-16								cellular protein modification process (GO:0006464)	1899	164	84.34	+	1.94	1.6e-11
cellular response to stress (GO:0033554)	1142	44	10.14	+	4.34	1.37e-12								cellular response to acid chemical (GO:0071229)	354	46	15.72	+	2.93	3.03e-06
cellular response to topologically incorrect protein (GO:0035967)	74	8	0.66	+	12.17	0.00181								cellular response to antibiotic (GO:0071236)	60	17	2.66	+	6.38	5.27e-05
cellular response to unfolded protein (GO:0034620)	51	7	0.45	+	15.45	0.00213								cellular response to chemical stimulus (GO:0070887)	1129	145	50.14	+	2.89	3.03e-24
defense response (GO:0006952)	1009	50	8.96	+	5.58	3.43e-19								cellular response to decreased oxygen levels (GO:0036294)	236	55	10.48	+	5.25	2.27e-17
defense response to bacterium (GO:0042742)	395	22	3.51	+	6.27	6.72e-08								cellular response to drug (GO:0035690)	83	20	3.69	+	5.43	3.16e-05
defense response to fungus (GO:0050832)	244	11	2.17	+	5.08	0.0492								cellular response to endogenous stimulus (GO:0071495)	644	65	28.6	+	2.27	2.06e-05
defense response to other organism (GO:0098542)	765	41	6.8	+	6.03	2.59e-16								cellular response to hormone stimulus (GO:0032870)	625	61	27.76	+	2.2	0.00021
defense response, incompatible interaction (GO:0009814)	174	14	1.55	+	9.06	3.96e-06								cellular response to hypoxia (GO:0071456)	234	55	10.39	+	5.29	1.62e-17
endoplasmic reticulum unfolded protein response (GO:0030968)	36	6	0.32	+	18.76	0.00486								cellular response to organic cyclic compound (GO:0071407)	131	20	5.82	+	3.44	0.0185
immune response (GO:0006955)	305	21	2.71	+	7.75	4.55e-09								cellular response to organic substance (GO:0071310)	756	84	33.58	+	2.5	1.18e-09
immune system process (GO:0002376)	373	26	3.31	+	7.85	6.76e-12								cellular response to oxygen levels (GO:0071453)	236	55	10.48	+	5.25	2.27e-17
innate immune response (GO:0045087)	301	21	2.67	+	7.85	3.59e-09								cellular response to oxygen-containing compound (GO:1901701)	501	57	22.25	+	2.56	4.7e-06
multi-organism process (GO:0051704)	1497	56	13.3	+	4.21	2.24e-16								cellular response to salicylic acid stimulus (GO:0071446)	46	15	2.04	+	7.34	7.63e-05
organonitrogen compound metabolic process (GO:1901564)	3942	61	35.02	+	1.74	0.0376								cellular response to stimulus (GO:0051716)	2427	244	107.79	+	2.26	5.46e-28
positive regulation of defense response (GO:0031349)	108	10	0.96	+	10.42	0.000272								cellular response to stress (GO:0033554)	1142	131	50.72	+	2.58	1.34e-17
positive regulation of immune response (GO:0050778)	78	7	0.69	+	10.1	0.0286								cellular response to topologically incorrect protein (GO:0035967)	74	18	3.29	+	5.48	0.00015
positive regulation of immune system process (GO:0002684)	78	7	0.69	+	10.1	0.0286								cellular response to unfolded protein (GO:0034620)	51	14	2.27	+	6.18	0.0013
positive regulation of innate immune response (GO:0045089)	78	7	0.69	+	10.1	0.0286								defense response (GO:0006952)	1009	169	44.81	+	3.77	7.18e-42
positive regulation of multi-organism process (GO:0043902)	101	10	0.9	+	11.15	0.000152								defense response by callose deposition (GO:0052542)	19	8	0.84	+	9.48	0.031
positive regulation of response to biotic stimulus (GO:0002833)	100	9	0.89	+	10.13	0.0015								defense response by cell wall thickening (GO:0052482)	17	8	0.76	+	10.6	0.0163
positive regulation of response to external stimulus (GO:0032103)	103	9	0.91	+	9.84	0.00189								defense response to bacterium (GO:0042742)	395	81	17.54	+	4.62	1.98e-23
protein folding (GO:0006457)	170	12	1.51	+	7.95	0.000233								defense response to fungus (GO:0050832)	244	44	10.84	+	4.06	5.16e-10
protein phosphorylation (GO:0006468)	801	21	7.12	+	2.95	0.0389								defense response to oomycetes (GO:0002229)	67	16	2.98	+	5.38	0.00101
regulation of cell death (GO:0010941)	79	9	0.7	+	12.83	0.000236								defense response to other organism (GO:0098542)	765	143	33.98	+	4.21	1.49e-39
regulation of defense response (GO:0031347)	260	18	2.31	+	7.79	1.71e-07								defense response, incompatible interaction (GO:0009814)	174	34	7.73	+	4.4	4.23e-08
regulation of immune response (GO:0050776)	131	10	1.16	+	8.59	0.00145								endoplasmic reticulum unfolded protein response (GO:0030968)	36	11	1.6	+	6.88	0.00922
regulation of immune system process (GO:0002682)	142	10	1.26	+	7.93	0.00289								glycoprotein metabolic process (GO:0009100)	116	18	5.15	+	3.49	0.0433
regulation of innate immune response (GO:0045088)	127	10	1.13	+	8.86	0.00111								immune response (GO:0006955)	305	63	13.55	+	4.65	7.52e-18
regulation of multi-organism process (GO:0043900)	281	14	2.5	+	5.61	0.00114								immune system process (GO:0002376)	373	75	16.57	+	4.53	4.62e-21
regulation of programmed cell death (GO:0043067)	62	7	0.55	+	12.71	0.00704								indole-containing compound biosynthetic process (GO:0042435)	49	12	2.18	+	5.51	0.0231
regulation of response to biotic stimulus (GO:0002831)	185	13	1.64	+	7.91	7.01e-05								indole-containing compound metabolic process (GO:0042430)	71	15	3.15	+	4.76	0.0087
regulation of response to external stimulus (GO:0032101)	190	13	1.69	+	7.7	9.42e-05								innate immune response (GO:0045087)	301	62	13.37	+	4.64	1.77e-17
regulation of response to stress (GO:0080134)	375	18	3.33	+	5.4	4.21e-05								localization (GO:0051179)	2293	149	101.84	+	1.46	0.0212
response to abiotic stimulus (GO:0009628)	2067	62	18.36	+	3.38	5.94e-14								macromolecule localization (GO:0033036)	988	77	43.88	+	1.75	0.0167
response to acid chemical (GO:0001101)	1127	33	10.01	+	3.3	8.69e-06								macromolecule modification (GO:0043412)	2303	170	102.29	+	1.66	8.36e-07
response to antibiotic (GO:0046677)	286	14	2.54	+	5.51	0.00139								metabolic process (GO:0008152)	7781	454	345.59	+	1.31	1.62e-07
response to bacterium (GO:0009617)	478	30	4.25	+	7.07	6.14e-13								multi-organism process (GO:0051704)	1497	204	66.49	+	3.07	3.2e-39
response to biotic stimulus (GO:0009607)	1024	51	9.1	+	5.61	9.68e-20								negative regulation of cell death (GO:0060548)	33	10	1.47	+	6.82	0.0273
response to chemical (GO:0042221)	2666	81	23.68	+	3.42	4.62e-20								negative regulation of defense response (GO:0031348)	63	14	2.8	+	5	0.0111
response to decreased oxygen levels (GO:0036293)	263	21	2.34	+	8.99	3.15e-10								nitrogen compound metabolic process (GO:0006807)	5448	324	241.97	+	1.34	9.17e-05
response to drug (GO:0042493)	501	21	4.45	+	4.72	2.51e-05								nucleic acid metabolic process (GO:0090304)	1639	36	72.8	-	0.49	0.0069
response to endogenous stimulus (GO:0009719)	1381	34	12.27	+	2.77	0.000304								organic substance metabolic process (GO:0071704)	6818	397	302.82	+	1.31	9.3e-06
response to endoplasmic reticulum stress (GO:0034976)	97	12	0.86	+	13.93	6.74e-07								organic substance transport (GO:0071702)	1132	86	50.28	+	1.71	0.0115
response to external biotic stimulus (GO:0043207)	1023	50	9.09	+	5.5	6.08e-19								organonitrogen compound metabolic process (GO:1901564)	3942	280	175.08	+	1.6	1.53e-11
response to external stimulus (GO:0009605)	1426	57	12.67	+	4.5	4.75e-18								phosphate-containing compound metabolic process (GO:0006796)	1584	138	70.35	+	1.96	1.91e-09
response to fungus (GO:0009620)	321	16	2.85	+	5.61	0.000166								phosphorus metabolic process (GO:0006793)	1625	145	72.17	+	2.01	5.66e-11
response to hormone (GO:0009725)	1363	34	12.11	+	2.81	0.000225								phosphorylation (GO:0016310)	1115	122	49.52	+	2.46	1.1e-14
response to hypoxia (GO:0001666)	259	21	2.3	+	9.13	2.38e-10								positive regulation of defense response (GO:0031349)	108	21	4.8	+	4.38	0.000341
response to inorganic substance (GO:0010035)	892	25	7.92	+	3.16	0.00178								positive regulation of immune response (GO:0050778)	78	15	3.46	+	4.33	0.0236
response to molecule of bacterial origin (GO:0002237)	34	6	0.3	+	19.87	0.00361								positive regulation of immune system process (GO:0002684)	78	15	3.46	+	4.33	0.0236
response to nitrogen compound (GO:1901698)	292	12	2.59	+	4.63	0.0497								positive regulation of innate immune response (GO:0045089)	78	15	3.46	+	4.33	0.0236
response to oomycetes (GO:0002239)	87	8	0.77	+	10.35	0.00558								positive regulation of multi-organism process (GO:0043902)	101	21	4.49	+	4.68	0.000126
response to organic cyclic compound (GO:0014070)	337	15	2.99	+	5.01	0.00171								positive regulation of response to biotic stimulus (GO:0002833)	100	21	4.44	+	4.73	0.000109
response to organic substance (GO:0010033)	1716	52	15.24	+	3.41	2.75e-11								positive regulation of response to external stimulus (GO:0032103)	103	21	4.57	+	4.59	0.000169
response to organonitrogen compound (GO:0010243)	243	12	2.16	+	5.56	0.00843								positive regulation of response to stimulus (GO:0048584)	243	34	10.79	+	3.15	8.96e-05
response to other organism (GO:0051707)	1023	50	9.09	+	5.5	6.08e-19								primary metabolic process (GO:0044238)	6141	360	272.75	+	1.32	3.91e-05
response to oxygen levels (GO:0070482)	264	21	2.35	+	8.95	3.37e-10								programmed cell death (GO:0012501)	91	18	4.04	+	4.45	0.00215
response to oxygen-containing compound (GO:1901700)	1507	43	13.39	+	3.21	5.55e-08								protein autophosphorylation (GO:0046777)	184	25	8.17	+	3.06	0.00915
response to salicylic acid (GO:0009751)	206	12	1.83	+	6.56	0.00163								protein metabolic process (GO:0019538)	2948	213	130.93	+	1.63	1.8e-08
response to stimulus (GO:0050896)	5347	128	47.5	+	2.69	1.19e-26								protein modification process (GO:0036211)	1899	164	84.34	+	1.94	1.6e-11
response to stress (GO:0006950)	3088	97	27.43	+	3.54	1.55e-26								protein phosphorylation (GO:0006468)	801	96	35.58	+	2.7	2.72e-13
response to temperature stimulus (GO:0009266)	579	20	5.14	+	3.89	0.00115								regulation of biological process (GO:0050789)	4958	311	220.21	+	1.41	8.55e-07
response to topologically incorrect protein (GO:0035966)	80	8	0.71	+	11.26	0.00311								regulation of cell death (GO:0010941)	79	15	3.51	+	4.28	0.027
response to unfolded protein (GO:0006986)	51	7	0.45	+	15.45	0.00213								regulation of cellular process (GO:0050794)	4314	270	191.6	+	1.41	2.8e-05
signal transduction (GO:0007165)	1305	38	11.59	+	3.28	5.56e-07								regulation of defense response (GO:0031347)	260	47	11.55	+	4.07	7.17e-11
signaling (GO:0023052)	1339	38	11.89	+	3.19	1.13e-06								regulation of immune response (GO:0050776)	131	25	5.82	+	4.3	3.07e-05
systemic acquired resistance (GO:0009627)	61	7	0.54	+	12.92	0.00637								regulation of immune system process (GO:0002682)	142	28	6.31	+	4.44	2.17e-06
Unclassified (UNCLASSIFIED)	6709	41	59.6	-	0.69	0								regulation of innate immune response (GO:0045088)	127	25	5.64	+	4.43	1.78e-05
CHILD GO TERMS REPRESENTING HIERARCHICAL CATEGORIES														regulation of multi-organism process (GO:0043900)	281	39	12.48	+	3.12	1.09e-05
GO biological process complete	Arabidopsis thaliana - REFLIST (27581)	upload_1 (245)	upload_1 (expected)	upload_1 (over/under)	upload_1 (fold Enrichment)	upload_1 (P-value)								regulation of response to biotic stimulus (GO:0002831)	185	38	8.22	+	4.62	7.15e-10
activation of innate immune response (GO:0002218)	62	7	0.55	+	12.71	0.00704								regulation of response to external stimulus (GO:0032101)	190	38	8.44	+	4.5	1.46e-09
benzene-containing compound metabolic process (GO:0042537)	51	6	0.45	+	13.24	0.0301								regulation of response to stimulus (GO:0048583)	692	83	30.73	+	2.7	3.67e-11
defense response to bacterium (GO:0042742)	395	22	3.51	+	6.27	6.72e-08								regulation of response to stress (GO:0080134)	375	61	16.66	+	3.66	7.9e-13
defense response to fungus (GO:0050832)	244	11	2.17	+	5.08	0.0492								regulation of salicylic acid biosynthetic process (GO:0080142)	12	7	0.53	+	13.13	0.0219
endoplasmic reticulum unfolded protein response (GO:0030968)	36	6	0.32	+	18.76	0.00486								regulation of salicylic acid metabolic process (GO:0010337)	20	8	0.89	+	9.01	0.0418
protein folding (GO:0006457)	170	12	1.51	+	7.95	0.000233								response to abiotic stimulus (GO:0009628)	2067	175	91.81	+	1.91	8.03e-12
protein phosphorylation (GO:0006468)	801	21	7.12	+	2.95	0.0389								response to abscisic acid (GO:0009737)	523	50	23.23	+	2.15	0.00475
regulation of programmed cell death (GO:0043067)	62	7	0.55	+	12.71	0.00704								response to acid chemical (GO:0001101)	1127	126	50.06	+	2.52	5.62e-16
response to hypoxia (GO:0001666)	259	21	2.3	+	9.13	2.38e-10								response to alcohol (GO:0097305)	527	50	23.41	+	2.14	0.00827
response to inorganic substance (GO:0010035)	892	25	7.92	+	3.16	0.00178								response to antibiotic (GO:0046677)	286	55	12.7	+	4.33	4.18e-14
response to molecule of bacterial origin (GO:0002237)	34	6	0.3	+	19.87	0.00361								response to bacterium (GO:0009617)	478	96	21.23	+	4.52	1.26e-27
response to oomycetes (GO:0002239)	87	8	0.77	+	10.35	0.00558								response to biotic stimulus (GO:0009607)	1024	186	45.48	+	4.09	3.51e-51
response to organonitrogen compound (GO:0010243)	243	12	2.16	+	5.56	0.00843								response to cadmium ion (GO:0046686)	344	46	15.28	+	3.01	1.32e-06
response to salicylic acid (GO:0009751)	206	12	1.83	+	6.56	0.00163								response to chemical (GO:0042221)	2666	296	118.41	+	2.5	4.77e-43
response to temperature stimulus (GO:0009266)	579	20	5.14	+	3.89	0.00115								response to chitin (GO:0010200)	138	38	6.13	+	6.2	2.32e-13
systemic acquired resistance (GO:0009627)	61	7	0.54	+	12.92	0.00637								response to decreased oxygen levels (GO:0036293)	263	58	11.68	+	4.97	1.95e-17
														response to drug (GO:0042493)	501	98	22.25	+	4.4	1.83e-27
														response to endogenous stimulus (GO:0009719)	1381	129	61.34	+	2.1	8.7e-11
														response to endoplasmic reticulum stress (GO:0034976)	97	23	4.31	+	5.34	3.36e-06
														response to external biotic stimulus (GO:0043207)	1023	186	45.44	+	4.09	3.08e-51
														response to external stimulus (GO:0009605)	1426	207	63.34	+	3.27	1.17e-43
														response to fungus (GO:0009620)	321	61	14.26	+	4.28	1.17e-15
														response to hormone (GO:0009725)	1363	125	60.54	+	2.06	7.75e-10
														response to hypoxia (GO:0001666)	259	58	11.5	+	5.04	1.03e-17
														response to inorganic substance (GO:0010035)	892	103	39.62	+	2.6	1.89e-13
														response to insect (GO:0009625)	32	10	1.42	+	7.04	0.0218
														response to metal ion (GO:0010038)	457	56	20.3	+	2.76	3.55e-07
														response to nitrogen compound (GO:1901698)	292	55	12.97	+	4.24	9.28e-14
														response to oomycetes (GO:0002239)	87	20	3.86	+	5.18	6.24e-05
														response to organic cyclic compound (GO:0014070)	337	48	14.97	+	3.21	8.05e-08
														response to organic substance (GO:0010033)	1716	190	76.22	+	2.49	3.3e-25
														response to organonitrogen compound (GO:0010243)	243	54	10.79	+	5	3.26e-16
														response to osmotic stress (GO:0006970)	545	49	24.21	+	2.02	0.0324
														response to other organism (GO:0051707)	1023	186	45.44	+	4.09	3.08e-51
														response to oxidative stress (GO:0006979)	393	50	17.45	+	2.86	1.1e-06
														response to oxygen levels (GO:0070482)	264	58	11.73	+	4.95	2.28e-17
														response to oxygen-containing compound (GO:1901700)	1507	167	66.93	+	2.5	8.7e-22
														response to ozone (GO:0010193)	33	10	1.47	+	6.82	0.0273
														response to reactive oxygen species (GO:0000302)	151	22	6.71	+	3.28	0.0129
														response to salicylic acid (GO:0009751)	206	42	9.15	+	4.59	4.97e-11
														response to stimulus (GO:0050896)	5347	491	237.49	+	2.07	6.85e-56
														response to stress (GO:0006950)	3088	341	137.15	+	2.49	9.27e-51
														response to topologically incorrect protein (GO:0035966)	80	19	3.55	+	5.35	8.92e-05
														response to unfolded protein (GO:0006986)	51	14	2.27	+	6.18	0.0013
														response to wounding (GO:0009611)	208	30	9.24	+	3.25	0.000315
														salicylic acid mediated signaling pathway (GO:0009863)	40	13	1.78	+	7.32	0.000663
														signal transduction (GO:0007165)	1305	136	57.96	+	2.35	4.4e-15
														signaling (GO:0023052)	1339	136	59.47	+	2.29	3.58e-14
														systemic acquired resistance (GO:0009627)	61	16	2.71	+	5.91	0.000338
														Unclassified (UNCLASSIFIED)	6709	211	297.98	-	0.71	0
														CHILD GO TERMS REPRESENTING HIERARCHICAL CATEGORIES
														GO biological process complete	Arabidopsis thaliana - REFLIST (27581)	upload_1 (1225)	upload_1 (expected)	upload_1 (over/under)	upload_1 (fold Enrichment)	upload_1 (P-value)
														aerobic respiration (GO:0009060)	81	15	3.6	+	4.17	0.0351
														cellular response to hypoxia (GO:0071456)	234	55	10.39	+	5.29	1.62e-17
														defense response by callose deposition (GO:0052542)	19	8	0.84	+	9.48	0.031
														defense response by cell wall thickening (GO:0052482)	17	8	0.76	+	10.6	0.0163
														defense response to bacterium (GO:0042742)	395	81	17.54	+	4.62	1.98e-23
														defense response to fungus (GO:0050832)	244	44	10.84	+	4.06	5.16e-10
														defense response to oomycetes (GO:0002229)	67	16	2.98	+	5.38	0.00101
														endoplasmic reticulum unfolded protein response (GO:0030968)	36	11	1.6	+	6.88	0.00922
														glycoprotein metabolic process (GO:0009100)	116	18	5.15	+	3.49	0.0433
														indole-containing compound biosynthetic process (GO:0042435)	49	12	2.18	+	5.51	0.0231
														negative regulation of cell death (GO:0060548)	33	10	1.47	+	6.82	0.0273
														negative regulation of defense response (GO:0031348)	63	14	2.8	+	5	0.0111
														organic substance transport (GO:0071702)	1132	86	50.28	+	1.71	0.0115
														positive regulation of innate immune response (GO:0045089)	78	15	3.46	+	4.33	0.0236
														programmed cell death (GO:0012501)	91	18	4.04	+	4.45	0.00215
														protein autophosphorylation (GO:0046777)	184	25	8.17	+	3.06	0.00915
														regulation of salicylic acid biosynthetic process (GO:0080142)	12	7	0.53	+	13.13	0.0219
														response to abscisic acid (GO:0009737)	523	50	23.23	+	2.15	0.00475
														response to cadmium ion (GO:0046686)	344	46	15.28	+	3.01	1.32e-06
														response to chitin (GO:0010200)	138	38	6.13	+	6.2	2.32e-13
														response to insect (GO:0009625)	32	10	1.42	+	7.04	0.0218
														response to osmotic stress (GO:0006970)	545	49	24.21	+	2.02	0.0324
														response to ozone (GO:0010193)	33	10	1.47	+	6.82	0.0273
														response to wounding (GO:0009611)	208	30	9.24	+	3.25	0.000315
														salicylic acid mediated signaling pathway (GO:0009863)	40	13	1.78	+	7.32	0.000663
														systemic acquired resistance (GO:0009627)	61	16	2.71	+	5.91	0.000338

## Sheet: Downregulated - 4 HPI
Dataset S07. Gene ontology terms overrepresented in Arabidopsis differentially expressed gene (DEG) datasets. Two DEG datasets were created from plants inoculated with 5 x 106 CFU/mL of either Escherichia coli O157:H7 or Salmonella enterica Typhimurium 14028s at 4 and 24 hours post inoculation (HPI). Ovelapping (shared column) and unique (bacterium-specific). DEGs in the two datasets were used as…
Shared							O157:H7 Specific							STm 14028s Specific
ALL GO TERMS							ALL GO TERMS							ALL GO TERMS
Analysis Type:	PANTHER Overrepresentation Test (Released 20190711)						Analysis Type:	PANTHER Overrepresentation Test (Released 20190711)						Analysis Type:	PANTHER Overrepresentation Test (Released 20190711)
Annotation Version and Release Date:	GO Ontology database Released 2019-12-09						Annotation Version and Release Date:	GO Ontology database Released 2019-12-09						Annotation Version and Release Date:	GO Ontology database Released 2019-12-09
Analyzed List:	upload_1 (Arabidopsis thaliana)						Analyzed List:	upload_1 (Arabidopsis thaliana)						Analyzed List:	upload_1 (Arabidopsis thaliana)
Reference List:	Arabidopsis thaliana (all genes in database)						Reference List:	Arabidopsis thaliana (all genes in database)						Reference List:	Arabidopsis thaliana (all genes in database)
Test Type:	FISHER						Test Type:	FISHER						Test Type:	FISHER
Correction:	BONFERRONI						Correction:	BONFERRONI						Correction:	BONFERRONI
Bonferroni count:	2757						Bonferroni count:	2757						Bonferroni count:	2757
GO biological process complete	Arabidopsis thaliana - REFLIST (27581)	upload_1 (476)	upload_1 (expected)	upload_1 (over/under)	upload_1 (fold Enrichment)	upload_1 (P-value)	GO biological process complete	Arabidopsis thaliana - REFLIST (27581)	upload_1 (620)	upload_1 (expected)	upload_1 (over/under)	upload_1 (fold Enrichment)	upload_1 (P-value)	GO biological process complete	Arabidopsis thaliana - REFLIST (27581)	upload_1 (144)	upload_1 (expected)	upload_1 (over/under)	upload_1 (fold Enrichment)	upload_1 (P-value)
cellular aromatic compound metabolic process (GO:0006725)	2397	74	41.37	+	1.79	0.00471	alternative mRNA splicing, via spliceosome (GO:0000380)	11	5	0.25	+	20.22	0.0498	RNA splicing (GO:0008380)	259	10	1.35	+	7.4	0.00423
cellular nitrogen compound metabolic process (GO:0034641)	2687	80	46.37	+	1.73	0.00722	cellular aromatic compound metabolic process (GO:0006725)	2397	97	53.88	+	1.8	0.000106	RNA processing (GO:0006396)	762	16	3.98	+	4.02	0.00853
chloroplast organization (GO:0009658)	228	17	3.93	+	4.32	0.00315	cellular component organization (GO:0016043)	2510	94	56.42	+	1.67	0.00432	gene expression (GO:0010467)	1410	21	7.36	+	2.85	0.0451
gene expression (GO:0010467)	1410	64	24.33	+	2.63	1.5e-08	cellular component organization or biogenesis (GO:0071840)	2830	104	63.62	+	1.63	0.00275	Unclassified (UNCLASSIFIED)	6709	21	35.03	-	0.6	0
heterocycle metabolic process (GO:0046483)	2272	74	39.21	+	1.89	0.000658	cellular metabolic process (GO:0044237)	6840	208	153.76	+	1.35	0.00434	CHILD GO TERMS REPRESENTING HIERARCHICAL CATEGORIES
macromolecule metabolic process (GO:0043170)	4716	129	81.39	+	1.58	0.000225	cellular nitrogen compound metabolic process (GO:0034641)	2687	104	60.4	+	1.72	0.000237	GO biological process complete	Arabidopsis thaliana - REFLIST (27581)	upload_1 (144)	upload_1 (expected)	upload_1 (over/under)	upload_1 (fold Enrichment)	upload_1 (P-value)
mRNA metabolic process (GO:0016071)	441	31	7.61	+	4.07	4.9e-07	cellular process (GO:0009987)	10105	294	227.15	+	1.29	0.000177	RNA splicing (GO:0008380)	259	10	1.35	+	7.4	0.00423
mRNA processing (GO:0006397)	340	27	5.87	+	4.6	6.28e-07	chloroplast organization (GO:0009658)	228	20	5.13	+	3.9	0.00194
mRNA splicing, via spliceosome (GO:0000398)	179	19	3.09	+	6.15	3.97e-06	gene expression (GO:0010467)	1410	85	31.7	+	2.68	2.48e-12
negative regulation of biological process (GO:0048519)	1051	40	18.14	+	2.21	0.0164	heterocycle metabolic process (GO:0046483)	2272	97	51.07	+	1.9	7.93e-06
nitrogen compound metabolic process (GO:0006807)	5448	140	94.02	+	1.49	0.00157	macromolecule metabolic process (GO:0043170)	4716	171	106.01	+	1.61	3.5e-07
nucleic acid metabolic process (GO:0090304)	1639	65	28.29	+	2.3	3.61e-06	mRNA metabolic process (GO:0016071)	441	40	9.91	+	4.03	2.11e-09
nucleobase-containing compound metabolic process (GO:0006139)	1980	69	34.17	+	2.02	0.000158	mRNA processing (GO:0006397)	340	36	7.64	+	4.71	4.82e-10
organic cyclic compound metabolic process (GO:1901360)	2489	75	42.96	+	1.75	0.0106	mRNA splicing, via spliceosome (GO:0000398)	179	26	4.02	+	6.46	1.98e-09
plastid organization (GO:0009657)	298	21	5.14	+	4.08	0.000426	negative regulation of biological process (GO:0048519)	1051	49	23.63	+	2.07	0.012
primary metabolic process (GO:0044238)	6141	150	105.98	+	1.42	0.0106	negative regulation of metabolic process (GO:0009892)	625	35	14.05	+	2.49	0.00611
regulation of biological process (GO:0050789)	4958	130	85.57	+	1.52	0.00203	nitrogen compound metabolic process (GO:0006807)	5448	182	122.47	+	1.49	5.22e-05
regulation of cellular metabolic process (GO:0031323)	2824	80	48.74	+	1.64	0.0365	nucleic acid metabolic process (GO:0090304)	1639	87	36.84	+	2.36	1.26e-09
regulation of cellular process (GO:0050794)	4314	112	74.45	+	1.5	0.0228	nucleobase-containing compound metabolic process (GO:0006139)	1980	92	44.51	+	2.07	3.71e-07
regulation of gene expression (GO:0010468)	2433	72	41.99	+	1.71	0.0275	organelle organization (GO:0006996)	1616	73	36.33	+	2.01	0.000116
regulation of macromolecule metabolic process (GO:0060255)	2853	85	49.24	+	1.73	0.0029	organic cyclic compound metabolic process (GO:1901360)	2489	99	55.95	+	1.77	0.000129
regulation of metabolic process (GO:0019222)	3108	93	53.64	+	1.73	0.000519	organic substance metabolic process (GO:0071704)	6818	207	153.26	+	1.35	0.00535
regulation of nucleobase-containing compound metabolic process (GO:0019219)	2194	66	37.86	+	1.74	0.0491	plastid organization (GO:0009657)	298	24	6.7	+	3.58	0.000663
regulation of primary metabolic process (GO:0080090)	2693	77	46.48	+	1.66	0.0474	primary metabolic process (GO:0044238)	6141	197	138.05	+	1.43	0.000208
RNA metabolic process (GO:0016070)	1235	58	21.31	+	2.72	4.64e-08	regulation of biological process (GO:0050789)	4958	161	111.45	+	1.44	0.00308
RNA processing (GO:0006396)	762	45	13.15	+	3.42	9.38e-09	regulation of cellular metabolic process (GO:0031323)	2824	102	63.48	+	1.61	0.00744
RNA splicing (GO:0008380)	259	28	4.47	+	6.26	3.27e-10	regulation of cellular process (GO:0050794)	4314	142	96.98	+	1.46	0.00944
RNA splicing, via transesterification reactions (GO:0000375)	202	21	3.49	+	6.02	7.67e-07	regulation of gene expression (GO:0010468)	2433	91	54.69	+	1.66	0.00864
RNA splicing, via transesterification reactions with bulged adenosine as nucleophile (GO:0000377)	202	21	3.49	+	6.02	7.67e-07	regulation of macromolecule metabolic process (GO:0060255)	2853	107	64.13	+	1.67	0.000738
Unclassified (UNCLASSIFIED)	6709	104	115.79	-	0.9	0	regulation of metabolic process (GO:0019222)	3108	116	69.87	+	1.66	0.000254
CHILD GO TERMS REPRESENTING HIERARCHICAL CATEGORIES							regulation of nitrogen compound metabolic process (GO:0051171)	2613	94	58.74	+	1.6	0.0246
GO biological process complete	Arabidopsis thaliana - REFLIST (27581)	upload_1 (102)	upload_1 (expected)	upload_1 (over/under)	upload_1 (fold Enrichment)	upload_1 (P-value)	regulation of nucleobase-containing compound metabolic process (GO:0019219)	2194	84	49.32	+	1.7	0.00865
chloroplast organization (GO:0009658)	228	17	3.93	+	4.32	0.00315	regulation of primary metabolic process (GO:0080090)	2693	98	60.54	+	1.62	0.00892
mRNA splicing, via spliceosome (GO:0000398)	179	19	3.09	+	6.15	3.97e-06	regulation of RNA metabolic process (GO:0051252)	2141	80	48.13	+	1.66	0.0407
negative regulation of biological process (GO:0048519)	1051	40	18.14	+	2.21	0.0164	RNA metabolic process (GO:0016070)	1235	77	27.76	+	2.77	1.25e-11
regulation of gene expression (GO:0010468)	2433	72	41.99	+	1.71	0.0275	RNA processing (GO:0006396)	762	61	17.13	+	3.56	3.56e-13
regulation of nucleobase-containing compound metabolic process (GO:0019219)	2194	66	37.86	+	1.74	0.0491	RNA splicing (GO:0008380)	259	38	5.82	+	6.53	6.72e-15
							RNA splicing, via transesterification reactions (GO:0000375)	202	28	4.54	+	6.17	7.21e-10
							RNA splicing, via transesterification reactions with bulged adenosine as nucleophile (GO:0000377)	202	28	4.54	+	6.17	7.21e-10
							Unclassified (UNCLASSIFIED)	6709	125	150.81	-	0.83	0
							CHILD GO TERMS REPRESENTING HIERARCHICAL CATEGORIES
							GO biological process complete	Arabidopsis thaliana - REFLIST (27581)	upload_1 (102)	upload_1 (expected)	upload_1 (over/under)	upload_1 (fold Enrichment)	upload_1 (P-value)
							alternative mRNA splicing, via spliceosome (GO:0000380)	11	5	0.25	+	20.22	0.0498
							chloroplast organization (GO:0009658)	228	20	5.13	+	3.9	0.00194
							negative regulation of metabolic process (GO:0009892)	625	35	14.05	+	2.49	0.00611
							regulation of gene expression (GO:0010468)	2433	91	54.69	+	1.66	0.00864
							regulation of RNA metabolic process (GO:0051252)	2141	80	48.13	+	1.66	0.0407

## Sheet: Downregulated - 24 HPI
Dataset S07. Gene ontology terms overrepresented in Arabidopsis differentially expressed gene (DEG) datasets. Two DEG datasets were created from plants inoculated with 5 x 106 CFU/mL of either Escherichia coli O157:H7 or Salmonella enterica Typhimurium 14028s at 4 and 24 hours post inoculation (HPI). Ovelapping (shared column) and unique (bacterium-specific). DEGs in the two datasets were used as…
Shared							O157:H7 Specific							STm 14028s Specific
ALL GO TERMS							ALL GO TERMS							ALL GO TERMS
Analysis Type:	PANTHER Overrepresentation Test (Released 20190711)						Analysis Type:	PANTHER Overrepresentation Test (Released 20190711)						Analysis Type:	PANTHER Overrepresentation Test (Released 20190711)
Annotation Version and Release Date:	GO Ontology database Released 2019-12-09						Annotation Version and Release Date:	GO Ontology database Released 2019-12-09						Annotation Version and Release Date:	GO Ontology database Released 2019-12-09
Analyzed List:	upload_1 (Arabidopsis thaliana)						Analyzed List:	upload_1 (Arabidopsis thaliana)						Analyzed List:	upload_1 (Arabidopsis thaliana)
Reference List:	Arabidopsis thaliana (all genes in database)						Reference List:	Arabidopsis thaliana (all genes in database)						Reference List:	Arabidopsis thaliana (all genes in database)
Test Type:	FISHER						Test Type:	FISHER						Test Type:	FISHER
Correction:	BONFERRONI						Correction:	BONFERRONI						Correction:	BONFERRONI
Bonferroni count:	2757						Bonferroni count:	2757						Bonferroni count:	2757
GO biological process complete	Arabidopsis thaliana - REFLIST (27581)	upload_1 (307)	upload_1 (expected)	upload_1 (over/under)	upload_1 (fold Enrichment)	upload_1 (P-value)	GO biological process complete	Arabidopsis thaliana - REFLIST (27581)	upload_1 (172)	upload_1 (expected)	upload_1 (over/under)	upload_1 (fold Enrichment)	upload_1 (P-value)	GO biological process complete	Arabidopsis thaliana - REFLIST (27581)	upload_1 (1312)	upload_1 (expected)	upload_1 (over/under)	upload_1 (fold Enrichment)	upload_1 (P-value)
biosynthetic process (GO:0009058)	2454	57	27.32	+	2.09	0.000478	rhythmic process (GO:0048511)	122	14	0.76	+	18.4	4.39e-10	chloroplast mRNA processing (GO:0010239)	8	7	0.38	+	18.39	0.00504
carbohydrate biosynthetic process (GO:0016051)	245	15	2.73	+	5.5	0.000627	circadian rhythm (GO:0007623)	109	12	0.68	+	17.65	3.92e-08	photosystem II assembly (GO:0010207)	25	17	1.19	+	14.3	3.2e-09
carbohydrate catabolic process (GO:0016052)	165	13	1.84	+	7.08	0.000272	DNA-dependent DNA replication (GO:0006261)	108	8	0.67	+	11.88	0.00183	photosynthesis, light harvesting in photosystem I (GO:0009768)	23	15	1.09	+	13.71	1.06e-07
carbohydrate metabolic process (GO:0005975)	673	25	7.49	+	3.34	0.000784	DNA replication (GO:0006260)	124	9	0.77	+	11.64	0.000425	photosynthetic electron transport in photosystem I (GO:0009773)	17	11	0.81	+	13.6	4.71e-05
carbon fixation (GO:0015977)	17	6	0.19	+	31.71	0.000403	response to reactive oxygen species (GO:0000302)	151	8	0.94	+	8.5	0.0195	photosystem I assembly (GO:0048564)	13	8	0.62	+	12.94	0.00584
cellular biosynthetic process (GO:0044249)	2274	51	25.31	+	2.01	0.0056	response to cold (GO:0009409)	400	15	2.49	+	6.01	0.000148	plastid translation (GO:0032544)	16	9	0.76	+	11.82	0.00233
cellular carbohydrate catabolic process (GO:0044275)	49	8	0.55	+	14.67	0.000562	response to oxidative stress (GO:0006979)	393	13	2.45	+	5.3	0.00456	protein-chromophore linkage (GO:0018298)	28	15	1.33	+	11.26	8.37e-07
cellular carbohydrate metabolic process (GO:0044262)	312	15	3.47	+	4.32	0.011	response to cadmium ion (GO:0046686)	344	11	2.15	+	5.13	0.0399	photosynthetic electron transport chain (GO:0009767)	40	21	1.9	+	11.04	3.18e-10
cellular glucan metabolic process (GO:0006073)	151	12	1.68	+	7.14	0.000778	response to temperature stimulus (GO:0009266)	579	17	3.61	+	4.71	0.000558	photosynthesis, light reaction (GO:0019684)	122	63	5.8	+	10.86	1.67e-34
cellular nitrogen compound biosynthetic process (GO:0044271)	1027	31	11.43	+	2.71	0.00229	cell cycle (GO:0007049)	492	14	3.07	+	4.56	0.00988	chloroplast RNA processing (GO:0031425)	21	10	1	+	10.01	0.00184
cellular polysaccharide catabolic process (GO:0044247)	22	7	0.24	+	28.59	6.4e-05	response to light stimulus (GO:0009416)	682	16	4.25	+	3.76	0.0215	chlorophyll biosynthetic process (GO:0015995)	37	17	1.76	+	9.66	3.53e-07
cellular polysaccharide metabolic process (GO:0044264)	217	12	2.42	+	4.97	0.0273	response to radiation (GO:0009314)	708	16	4.42	+	3.62	0.0338	photosynthesis, light harvesting (GO:0009765)	44	20	2.09	+	9.56	9.65e-09
cellular process (GO:0009987)	10105	157	112.48	+	1.4	0.000734	response to inorganic substance (GO:0010035)	892	20	5.56	+	3.6	0.00292	photosynthesis (GO:0015979)	178	75	8.47	+	8.86	1e-36
chlorophyll metabolic process (GO:0015994)	57	8	0.63	+	12.61	0.00159	response to abiotic stimulus (GO:0009628)	2067	36	12.89	+	2.79	5.49e-05	response to low light intensity stimulus (GO:0009645)	19	8	0.9	+	8.85	0.05
cofactor metabolic process (GO:0051186)	419	19	4.66	+	4.07	0.00133	response to oxygen-containing compound (GO:1901700)	1507	25	9.4	+	2.66	0.0251	porphyrin-containing compound biosynthetic process (GO:0006779)	46	18	2.19	+	8.23	8.17e-07
cold acclimation (GO:0009631)	56	7	0.62	+	11.23	0.0165	response to chemical (GO:0042221)	2666	37	16.63	+	2.23	0.0098	tetrapyrrole biosynthetic process (GO:0033014)	50	19	2.38	+	7.99	3.94e-07
generation of precursor metabolites and energy (GO:0006091)	342	22	3.81	+	5.78	3.77e-07	response to stimulus (GO:0050896)	5347	58	33.34	+	1.74	0.029	chlorophyll metabolic process (GO:0015994)	57	20	2.71	+	7.38	4.12e-07
glucan catabolic process (GO:0009251)	22	7	0.24	+	28.59	6.4e-05	Unclassified (UNCLASSIFIED)	6709	32	41.84	-	0.76	0	response to high light intensity (GO:0009644)	63	22	3	+	7.34	5.41e-08
glucan metabolic process (GO:0044042)	151	12	1.68	+	7.14	0.000778	CHILD GO TERMS REPRESENTING HIERARCHICAL CATEGORIES							tetrapyrrole metabolic process (GO:0033013)	72	22	3.42	+	6.42	4.57e-07
gluconeogenesis (GO:0006094)	22	5	0.24	+	20.42	0.0285	GO biological process complete	Arabidopsis thaliana - REFLIST (27581)	upload_1 (172)	upload_1 (expected)	upload_1 (over/under)	upload_1 (fold Enrichment)	upload_1 (P-value)	porphyrin-containing compound metabolic process (GO:0006778)	69	21	3.28	+	6.4	1.26e-06
glucose metabolic process (GO:0006006)	44	6	0.49	+	12.25	0.0494	circadian rhythm (GO:0007623)	109	12	0.68	+	17.65	3.92e-08	regulation of photosynthesis (GO:0010109)	42	12	2	+	6.01	0.0118
hexose biosynthetic process (GO:0019319)	25	5	0.28	+	17.97	0.0491	DNA-dependent DNA replication (GO:0006261)	108	8	0.67	+	11.88	0.00183	thylakoid membrane organization (GO:0010027)	50	14	2.38	+	5.89	0.00232
hexose metabolic process (GO:0019318)	82	8	0.91	+	8.76	0.0192	response to reactive oxygen species (GO:0000302)	151	8	0.94	+	8.5	0.0195	protein targeting to chloroplast (GO:0045036)	46	12	2.19	+	5.48	0.0259
monosaccharide biosynthetic process (GO:0046364)	43	6	0.48	+	12.54	0.0439	response to cold (GO:0009409)	400	15	2.49	+	6.01	0.000148	establishment of protein localization to chloroplast (GO:0072596)	46	12	2.19	+	5.48	0.0259
monosaccharide metabolic process (GO:0005996)	113	9	1.26	+	7.16	0.0239	response to cadmium ion (GO:0046686)	344	11	2.15	+	5.13	0.0399	protein localization to chloroplast (GO:0072598)	48	12	2.28	+	5.26	0.0373
organic substance biosynthetic process (GO:1901576)	2308	57	25.69	+	2.22	5.63e-05	cell cycle (GO:0007049)	492	14	3.07	+	4.56	0.00988	plastid membrane organization (GO:0009668)	57	14	2.71	+	5.16	0.00866
organonitrogen compound biosynthetic process (GO:1901566)	1163	33	12.95	+	2.55	0.00371	response to light stimulus (GO:0009416)	682	16	4.25	+	3.76	0.0215	plastid organization (GO:0009657)	298	72	14.18	+	5.08	1.61e-22
photosynthesis (GO:0015979)	178	26	1.98	+	13.12	1.06e-16								chloroplast organization (GO:0009658)	228	55	10.85	+	5.07	1.17e-16
photosynthesis, dark reaction (GO:0019685)	14	6	0.16	+	38.5	0.000159								electron transport chain (GO:0022900)	95	22	4.52	+	4.87	3.64e-05
photosynthesis, light harvesting (GO:0009765)	44	7	0.49	+	14.29	0.00386								generation of precursor metabolites and energy (GO:0006091)	342	79	16.27	+	4.86	7.72e-24
photosynthesis, light reaction (GO:0019684)	122	15	1.36	+	11.05	9.62e-08								pigment biosynthetic process (GO:0046148)	102	22	4.85	+	4.53	0.00011
plastid organization (GO:0009657)	298	19	3.32	+	5.73	8.07e-06								response to blue light (GO:0009637)	93	19	4.42	+	4.29	0.00187
plastid translation (GO:0032544)	16	5	0.18	+	28.08	0.0076								response to light intensity (GO:0009642)	142	29	6.75	+	4.29	2.41e-06
polysaccharide catabolic process (GO:0000272)	67	8	0.75	+	10.73	0.00483								fatty acid biosynthetic process (GO:0006633)	122	24	5.8	+	4.14	0.000124
porphyrin-containing compound metabolic process (GO:0006778)	69	8	0.77	+	10.42	0.00591								pigment metabolic process (GO:0042440)	124	24	5.9	+	4.07	0.000163
reductive pentose-phosphate cycle (GO:0019253)	13	6	0.14	+	41.46	0.000112								cofactor biosynthetic process (GO:0051188)	228	37	10.85	+	3.41	3.68e-06
response to abiotic stimulus (GO:0009628)	2067	49	23.01	+	2.13	0.00185								fatty acid metabolic process (GO:0006631)	201	32	9.56	+	3.35	7.02e-05
response to cold (GO:0009409)	400	27	4.45	+	6.06	9.59e-10								monocarboxylic acid biosynthetic process (GO:0072330)	206	31	9.8	+	3.16	0.000356
response to stimulus (GO:0050896)	5347	93	59.52	+	1.56	0.0166								response to light stimulus (GO:0009416)	682	90	32.44	+	2.77	1.12e-12
response to temperature stimulus (GO:0009266)	579	30	6.44	+	4.65	2.6e-08								response to radiation (GO:0009314)	708	90	33.68	+	2.67	5.33e-12
small molecule biosynthetic process (GO:0044283)	602	21	6.7	+	3.13	0.0183								monocarboxylic acid metabolic process (GO:0032787)	424	53	20.17	+	2.63	6.38e-06
small molecule metabolic process (GO:0044281)	1408	36	15.67	+	2.3	0.0158								cofactor metabolic process (GO:0051186)	419	51	19.93	+	2.56	2.67e-05
starch catabolic process (GO:0005983)	17	6	0.19	+	31.71	0.000403								cellular protein-containing complex assembly (GO:0034622)	429	47	20.41	+	2.3	0.00177
starch metabolic process (GO:0005982)	54	9	0.6	+	14.97	8.18e-05								lipid biosynthetic process (GO:0008610)	466	50	22.17	+	2.26	0.00149
tetrapyrrole metabolic process (GO:0033013)	72	8	0.8	+	9.98	0.00791								response to cold (GO:0009409)	400	42	19.03	+	2.21	0.0217
Unclassified (UNCLASSIFIED)	6709	63	74.68	-	0.84	0								protein-containing complex assembly (GO:0065003)	479	50	22.79	+	2.19	0.00355
CHILD GO TERMS REPRESENTING HIERARCHICAL CATEGORIES														small molecule biosynthetic process (GO:0044283)	602	62	28.64	+	2.17	0.00023
GO biological process complete	Arabidopsis thaliana - REFLIST (27581)	upload_1 (307)	upload_1 (expected)	upload_1 (over/under)	upload_1 (fold Enrichment)	upload_1 (P-value)								carboxylic acid metabolic process (GO:0019752)	828	85	39.39	+	2.16	1.12e-06
chlorophyll metabolic process (GO:0015994)	57	8	0.63	+	12.61	0.00159								translation (GO:0006412)	431	44	20.5	+	2.15	0.0273
cold acclimation (GO:0009631)	56	7	0.62	+	11.23	0.0165								peptide biosynthetic process (GO:0043043)	436	44	20.74	+	2.12	0.0316
gluconeogenesis (GO:0006094)	22	5	0.24	+	20.42	0.0285								organic acid biosynthetic process (GO:0016053)	442	44	21.03	+	2.09	0.0393
photosynthesis, light harvesting (GO:0009765)	44	7	0.49	+	14.29	0.00386								carboxylic acid biosynthetic process (GO:0046394)	442	44	21.03	+	2.09	0.0393
plastid translation (GO:0032544)	16	5	0.18	+	28.08	0.0076								carbohydrate metabolic process (GO:0005975)	673	66	32.01	+	2.06	0.000593
reductive pentose-phosphate cycle (GO:0019253)	13	6	0.14	+	41.46	0.000112								amide biosynthetic process (GO:0043604)	502	49	23.88	+	2.05	0.0283
starch catabolic process (GO:0005983)	17	6	0.19	+	31.71	0.000403								organic acid metabolic process (GO:0006082)	959	93	45.62	+	2.04	2.49e-06
														oxoacid metabolic process (GO:0043436)	952	92	45.29	+	2.03	3.56e-06
														protein-containing complex subunit organization (GO:0043933)	554	53	26.35	+	2.01	0.0186
														cellular nitrogen compound biosynthetic process (GO:0044271)	1027	97	48.85	+	1.99	3.56e-06
														small molecule metabolic process (GO:0044281)	1408	129	66.98	+	1.93	3.85e-08
														cellular lipid metabolic process (GO:0044255)	627	57	29.83	+	1.91	0.029
														lipid metabolic process (GO:0006629)	737	66	35.06	+	1.88	0.0111
														oxidation-reduction process (GO:0055114)	977	87	46.47	+	1.87	0.000315
														organic substance biosynthetic process (GO:1901576)	2308	198	109.79	+	1.8	2.3e-11
														organonitrogen compound biosynthetic process (GO:1901566)	1163	99	55.32	+	1.79	0.000319
														biosynthetic process (GO:0009058)	2454	208	116.73	+	1.78	1.19e-11
														cellular component biogenesis (GO:0044085)	1170	97	55.66	+	1.74	0.00149
														cellular biosynthetic process (GO:0044249)	2274	187	108.17	+	1.73	5.09e-09
														response to abiotic stimulus (GO:0009628)	2067	166	98.33	+	1.69	6.16e-07
														cellular component organization (GO:0016043)	2510	189	119.4	+	1.58	3.87e-06
														cellular component organization or biogenesis (GO:0071840)	2830	206	134.62	+	1.53	8.51e-06
														metabolic process (GO:0008152)	7781	528	370.13	+	1.43	2.39e-16
														cellular metabolic process (GO:0044237)	6840	459	325.37	+	1.41	3.31e-12
														organic substance metabolic process (GO:0071704)	6818	434	324.33	+	1.34	9e-08
														cellular process (GO:0009987)	10105	626	480.68	+	1.3	3.9e-12
														response to stimulus (GO:0050896)	5347	331	254.35	+	1.3	0.00117
														primary metabolic process (GO:0044238)	6141	379	292.12	+	1.3	0.000136
														Unclassified (UNCLASSIFIED)	6709	296	319.14	-	0.93	0
														cellular macromolecule catabolic process (GO:0044265)	720	11	34.25	-	0.32	0.0231
														cellular protein catabolic process (GO:0044257)	594	7	28.26	-	0.25	0.0114
														proteolysis involved in cellular protein catabolic process (GO:0051603)	585	6	27.83	-	0.22	0.00505
														ubiquitin-dependent protein catabolic process (GO:0006511)	481	4	22.88	-	0.17	0.0119
														modification-dependent protein catabolic process (GO:0019941)	494	4	23.5	-	0.17	0.00574
														modification-dependent macromolecule catabolic process (GO:0043632)	506	4	24.07	-	0.17	0.00412
														CHILD GO TERMS REPRESENTING HIERARCHICAL CATEGORIES
														GO biological process complete	Arabidopsis thaliana - REFLIST (27581)	upload_1 (1312)	upload_1 (expected)	upload_1 (over/under)	upload_1 (fold Enrichment)	upload_1 (P-value)
														chloroplast mRNA processing (GO:0010239)	8	7	0.38	+	18.39	0.00504
														photosystem II assembly (GO:0010207)	25	17	1.19	+	14.3	3.2e-09
														photosynthesis, light harvesting in photosystem I (GO:0009768)	23	15	1.09	+	13.71	1.06e-07
														photosynthetic electron transport in photosystem I (GO:0009773)	17	11	0.81	+	13.6	4.71e-05
														photosystem I assembly (GO:0048564)	13	8	0.62	+	12.94	0.00584
														plastid translation (GO:0032544)	16	9	0.76	+	11.82	0.00233
														protein-chromophore linkage (GO:0018298)	28	15	1.33	+	11.26	8.37e-07
														chlorophyll biosynthetic process (GO:0015995)	37	17	1.76	+	9.66	3.53e-07
														response to low light intensity stimulus (GO:0009645)	19	8	0.9	+	8.85	0.05
														regulation of photosynthesis (GO:0010109)	42	12	2	+	6.01	0.0118
														thylakoid membrane organization (GO:0010027)	50	14	2.38	+	5.89	0.00232
														protein targeting to chloroplast (GO:0045036)	46	12	2.19	+	5.48	0.0259
														chloroplast organization (GO:0009658)	228	55	10.85	+	5.07	1.17e-16
														response to blue light (GO:0009637)	93	19	4.42	+	4.29	0.00187
														fatty acid biosynthetic process (GO:0006633)	122	24	5.8	+	4.14	0.000124
														response to cold (GO:0009409)	400	42	19.03	+	2.21	0.0217
														carbohydrate metabolic process (GO:0005975)	673	66	32.01	+	2.06	0.000593
